# Supplementary material for: Facile synthesis of arylthiophenyl-functionalized diketopyrrolopyrrole derivatives via direct C–H arylation: characterization and utilization in organic electronic devices
Source: Royal Society of Chemistry journal article supplement (doi:10.1039/c5nj02631h), 2015-10-23
Supplement: c5nj02631h1.pdf [file c5nj02631h1.pdf]

## Supporting Information

# Facile Synthesis of Arylthiophenyl-Functionalized Diketopyrrolopyrrole Derivatives via Direct C-H Arylation: Characterization and Utilization in Organic Electronic Devices

*Akshaya Kumar Palai<sup>a),1</sup>, Amit Kumar<sup>a),2</sup>, Kyoseung Sim<sup>a)</sup>, Jaehyuk Kwon<sup>a)</sup>, Tae Joo Shin<sup>b)</sup>, Soonmin Jang<sup>c)</sup>, Sungwoo Cho<sup>d)</sup>, Seung-Un Park<sup>a)</sup>, Seungmoon Pyo<sup>a)</sup>\**

<sup>a)</sup>Department of Chemistry, Konkuk University, 120 Neungdong-ro, Gwangjin-gu, Seoul 143-701, Republic of Korea.

<sup>b)</sup>Pohang Accelerator Laboratory, Pohang, 790-784, Republic of Korea.

<sup>c)</sup>Department of Chemistry, Sejong University, 209 Neungdong-ro, Gwangjin-gu, Seoul 143-747, Republic of Korea.

<sup>d)</sup>Center for Core Research Facility, Daegu Gyeongbuk Institute of Science & Technology, Daegu 711-873, Republic of Korea.

<sup>1</sup>Present Address: Laboratory for Advanced Research in Polymeric Materials (LARPM), Central Institute of Plastics Engineering and Technology, Bhubaneswar 751 024, Odisha, India.

<sup>2</sup>Present Address: Amity Institute of Advanced Research and Studies (Materials and Devices), Amity University, Noida, UP-201303, India

\*To whom correspondence should be addressed: S. Pyo ([pyosm@konkuk.ac.kr](mailto:pyosm@konkuk.ac.kr))

Tel.: 82-2-450-3397, Fax: 82-2-34365382

## Contents

|                                                                                                                                                    |    |
|----------------------------------------------------------------------------------------------------------------------------------------------------|----|
| 1. <sup>1</sup> H NMR spectrum of <b>DPPa</b> .....                                                                                                | S2 |
| 2. HRMS spectrum of <b>DPPa</b> .....                                                                                                              | S2 |
| 3. <sup>1</sup> H NMR spectrum of <b>DPPb</b> .....                                                                                                | S3 |
| 4. HRMS spectrum of <b>DPPb</b> .....                                                                                                              | S3 |
| 5. <sup>1</sup> H NMR spectrum of <b>DPPc</b> .....                                                                                                | S4 |
| 6. HRMS spectrum of <b>DPPc</b> .....                                                                                                              | S4 |
| 7. Optimized geometry of <b>DPPa</b> and <b>DPPb</b> .....                                                                                         | S5 |
| 8. Schematic diagram of the molecular arrangement of <b>DPPa</b> and <b>DPPb</b> thin-film.....                                                    | S5 |
| 9. Output (a) and transfer (b) characteristic curves of OFET device based on <b>DPPa</b> measured after 100 days storage in ambient condition..... | S6 |

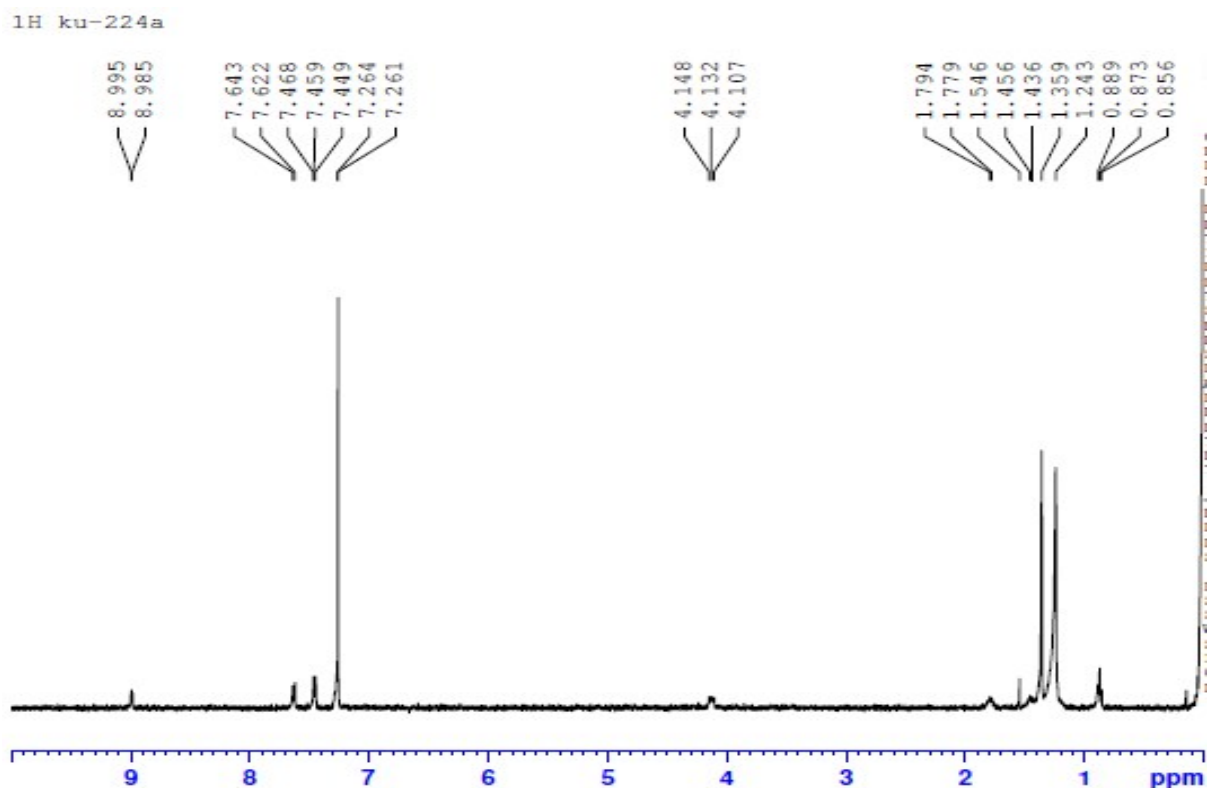

**Figure S1a.**  $^1\text{H}$  NMR spectrum of DPPa

KU-224a\_131002212118 #15-43 RT: 0.12-0.36 AV: 29 NL: 7.34E6  
F: FTMS + p ESI sid=30.00 Full ms [500.00-]

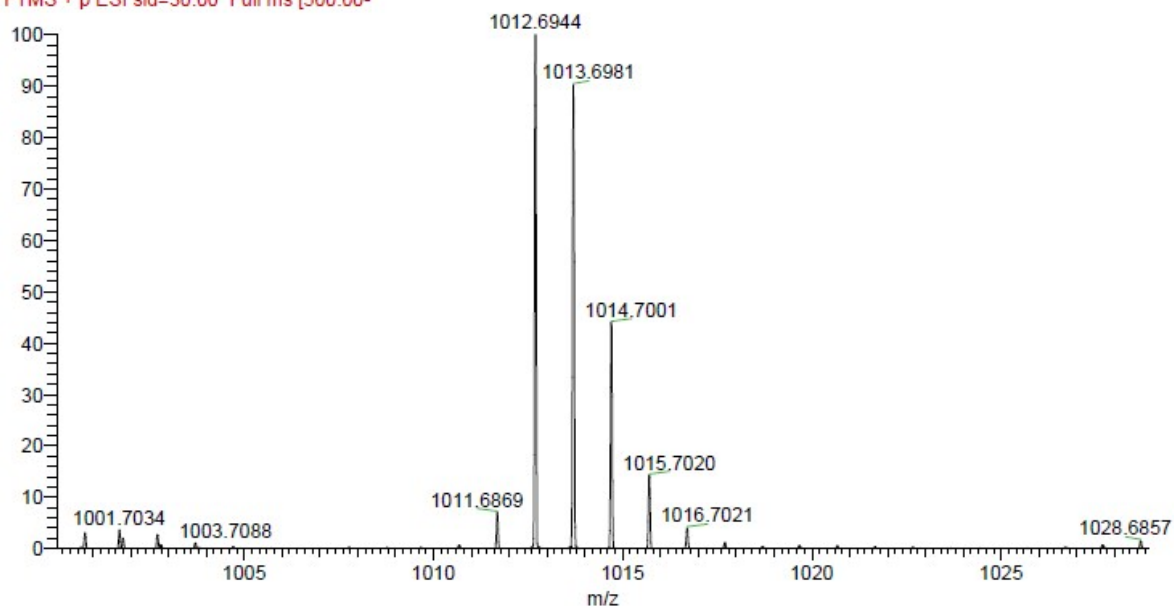

**Figure S1b.** HRMS spectrum of DPPa

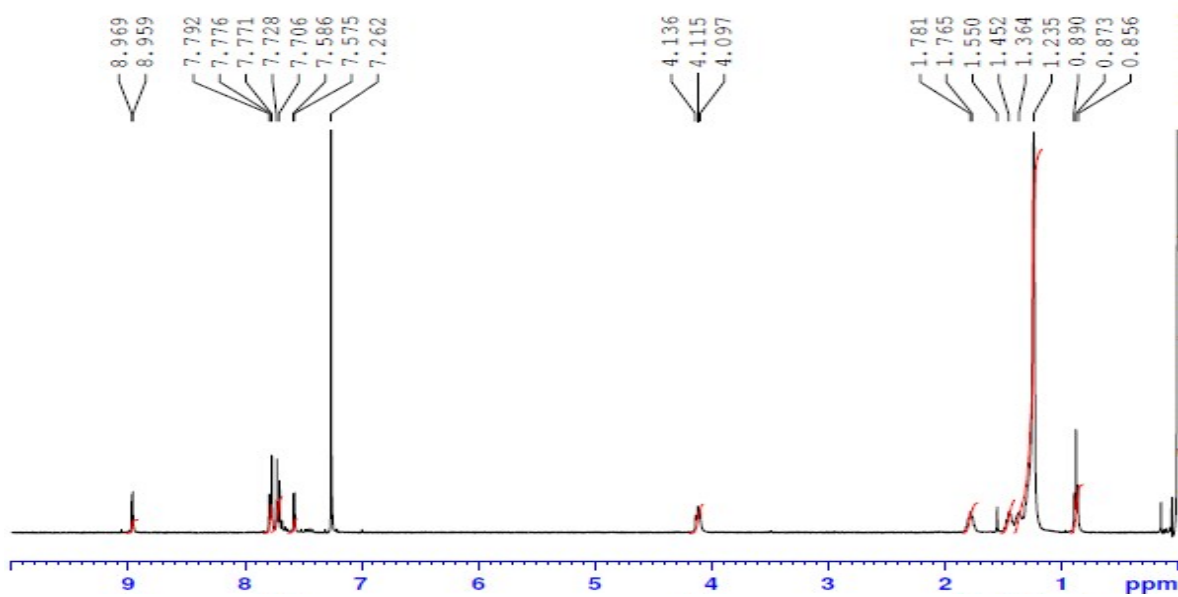

Figure S2a. <sup>1</sup>H NMR spectrum of DPPb

KU-238-1 #20-21 RT: 0.32-0.34 AV: 2 NL: 1.20E6  
F: FTMS + p ESI Full ms [200.00-1800.00]

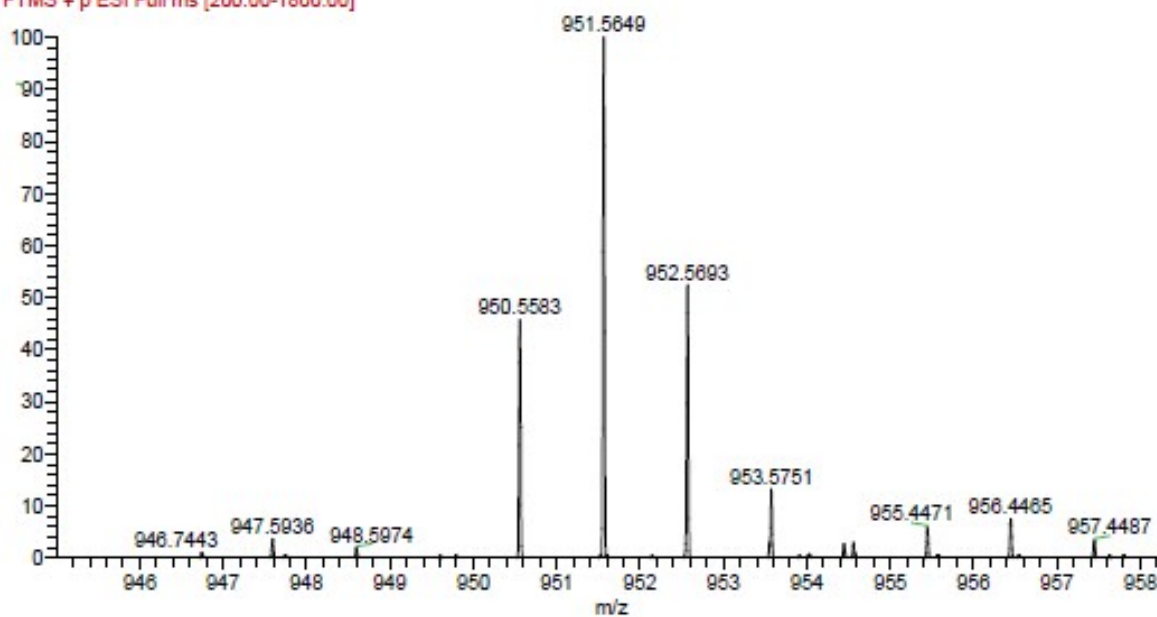

Figure S2b. HRMS spectrum of DPPb

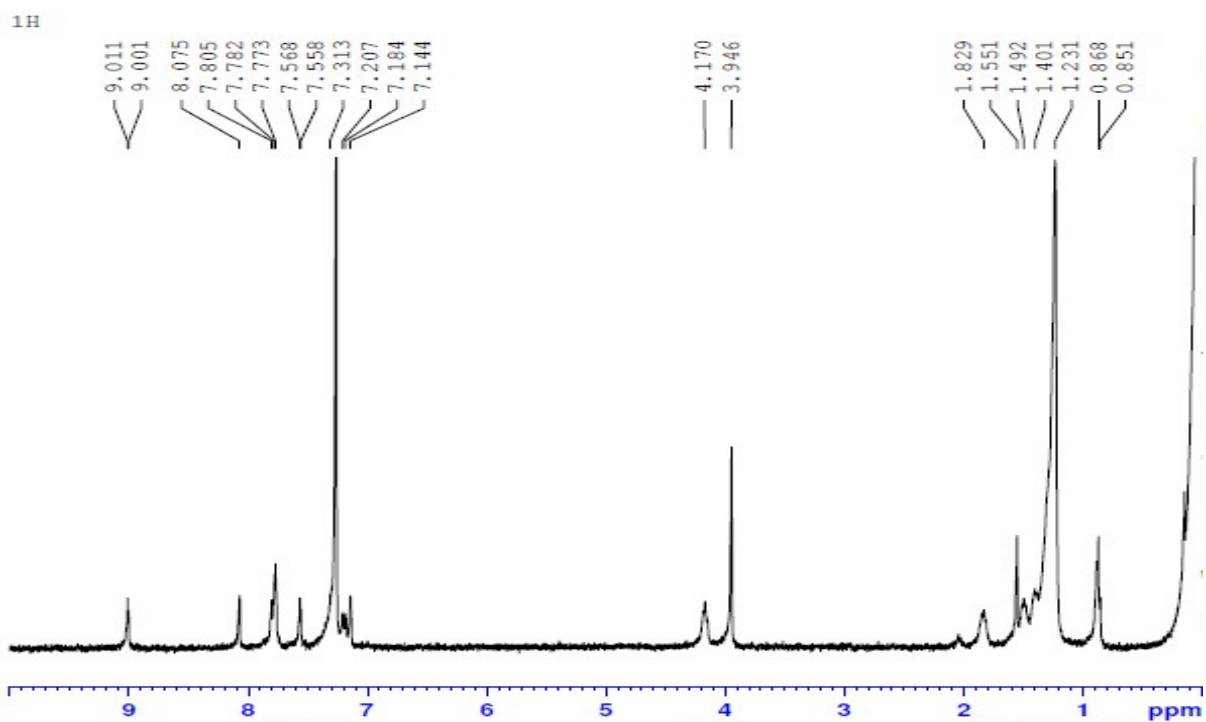

**Figure S3a.** <sup>1</sup>H NMR spectrum of DPPc

KU-240-1 #8-20 RT: 0.16-0.34 AV: 13 SM: 5G NL: 1.45E6  
F: FTMS + p ESI Full ms [200.00-1800.00]

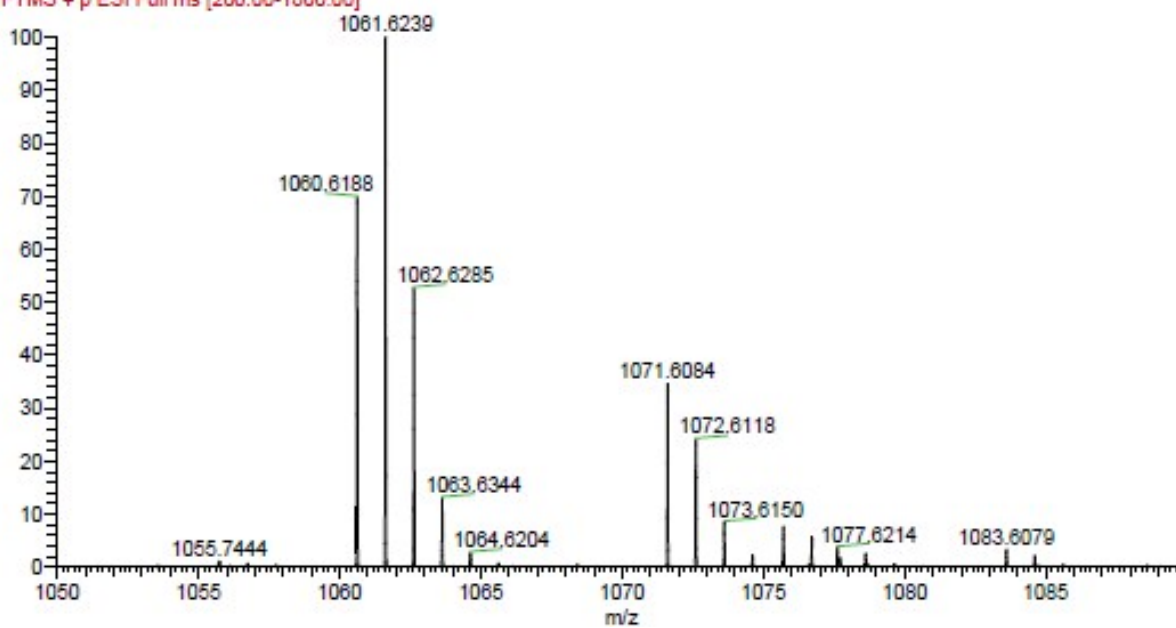

**Figure S3b.** HRMS spectrum of DPPc

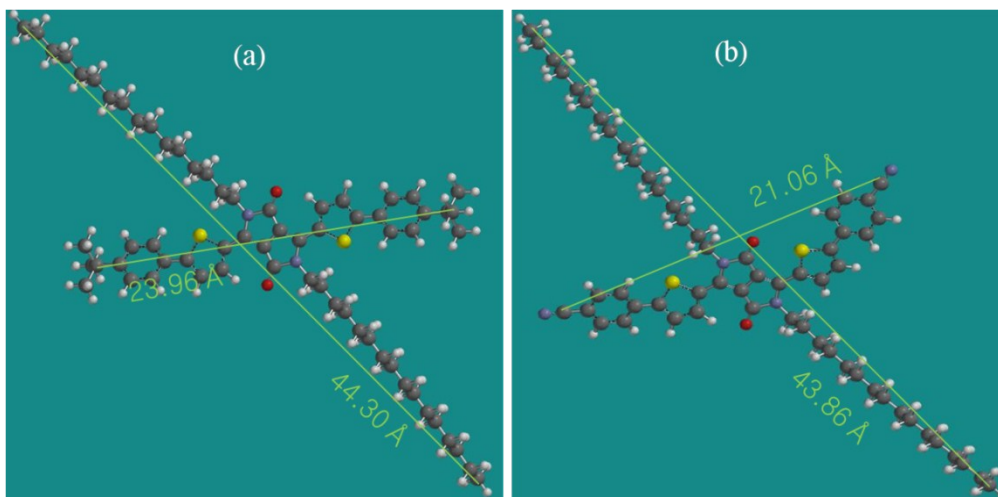

**Figure S4.** Optimized geometry of (a) **DPPa** and (b) **DPPb** showing the bond distance of the respective molecules from DFT calculations

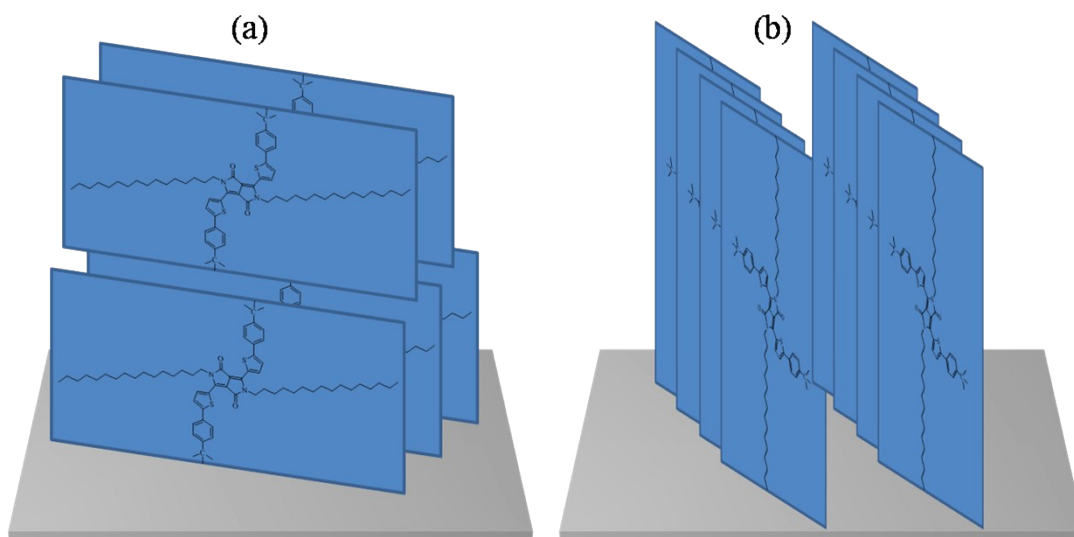

**Figure S5.** Schematic diagram of the molecular arrangement of (a) **DPPa** and (b) **DPPb** film on the ITO surface.

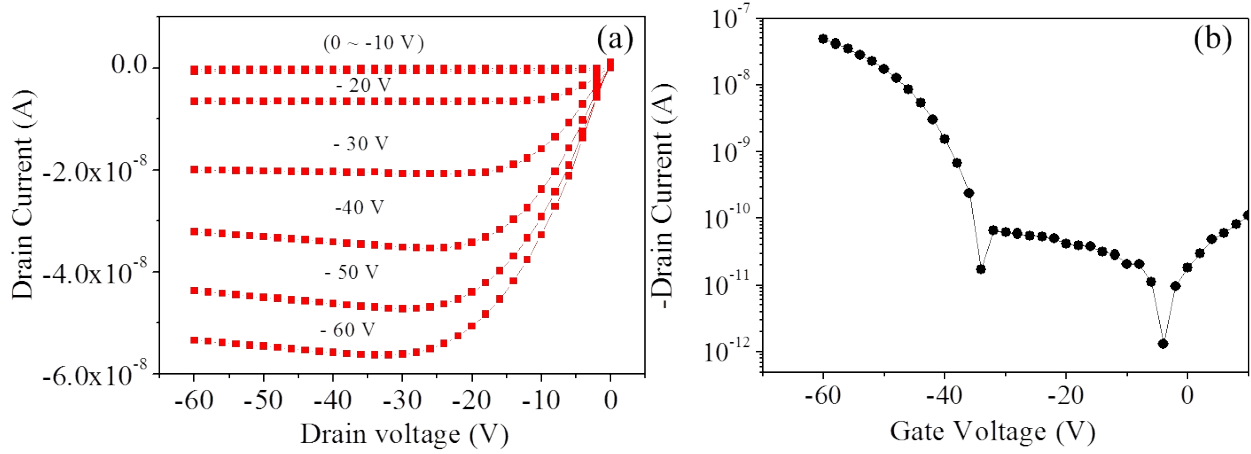

**Figure S6.** Output (a) and transfer (b) characteristic curves of OFET device based on **DPPa** measured after 100 days storage in ambient conditions.
